# Supplementary material for: Matrix stiffness induces epithelial-to-mesenchymal transition via Piezo1-regulated calcium flux in prostate cancer cells
Source: PubMed Central journal article supplement — iScience. 2023 Feb 25;26(4):106275. doi: 10.1016/j.isci.2023.106275 (PMC10025097; doi:10.1016/j.isci.2023.106275), 2023-02-25
Supplement: mmc1.pdf [file mmc1.pdf]

iScience, Volume 26

## **Supplemental information**

### **Matrix stiffness induces epithelial-to-mesenchymal transition via Piezo1-regulated calcium flux in prostate cancer cells**

**Maria Lopez-Cavestany, Su Bin Hahn, Jacob M. Hope, Noah T. Reckhorn, Joshua D. Greenlee, Samantha C. Schwager, Jacob A. VanderBurgh, Cynthia A. Reinhart-King, and Michael R. King**

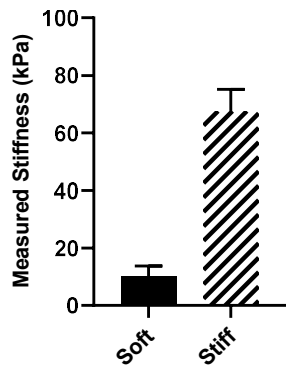

**Figure S1.** PA gel elastic modulus measurements via contact mode atomic force microscopy. Measurements were performed following the protocol outlined in the STAR methods section. Error bars represent mean  $\pm$  SD for measurements taken at 16 locations in each gel within a 120x120µm grid.
